# Supplementary material for: Identification of Veratrum Species in Pimacao Based on ITS2 Sequences and Steroidal Alkaloids by a Pseudo-Targeted Metabolomics Method
Source: Front Plant Sci. 2022 Apr 11;13:831562. doi: 10.3389/fpls.2022.831562 (PMC9037537; doi:10.3389/fpls.2022.831562)
Supplement: Supplementary Table 1 — The results of labeled 147 variables. [file Table_1.xlsx]

## Sheet: Sheet1
Compound ID No.	Compound ID	name	RT	PrecursorMZ	No.1	No.2	No.3	No.4	No.5		Compound	Compound ID	Accepted?	Adducts	Formula	Score	Fragmentation Score	Mass Error (ppm)	Isotope Similarity	Theoretical Isotope Distribution	Description	Neutral mass (Da)	m/z	Charge	Retention time (min)	Anova (p)	q Value	Max Fold Change
1	C-N-(methoxycarbonyl)-pseudojervine	10.03_628.3483m/z	10.03	628.348	628.35	610.334	82.3384	159.582	95.5814		10.03_628.3483m/z	C-N-(methoxycarbonyl)-pseudojervine	*	M+H-H2O	C35H51NO10	52.2	95.3	0.444779	66.3571	100 - 39.2 - 9.53 - 1.73 - 0.256	C-N-(methoxycarbonyl)-pseudojervine.mol		628.348	1	10.0327	0.149758	0.000388123	Infinity
2	B-veratrosine	10.28_554.3485m/z	10.28	554.348	554.348	439.248	84.0809	249.165	536.337		10.28_554.3485m/z	B-veratrosine	*	M+H-H2O	C33H49NO7	52	73.4	1.46275	88.4493	100 - 36.9 - 8.05 - 1.3 - 0.168	B-veratrosine.mol		554.348	1	10.2764	0.00226262	7.25167e-06	19.1869
3	A-3-acetyl-15-angeloylgermine	10.46_598.3371m/z	10.46	598.337	598.336	580.329	520.309	154.123	420.252		10.46_598.3371m/z	A-3-acetyl-15-angeloylgermine	*	M+H-2H2O	C34H51NO10	51.1	66.6	-0.483101	89.5066	100 - 38.1 - 9.12 - 1.63 - 0.238	A-3-acetyl-15-angeloylgermine.mol		598.337	1	10.4597	1.40621e-12	1.67547e-14	147.931
4	E-glucoveracintine	10.49_546.3796m/z	10.49	546.38	546.378	528.369	216.3	216.41	84.0803		10.49_546.3796m/z	E-glucoveracintine	*	M+H	C32H51NO6	50.5	64.2	1.19018	89.4993	100 - 35.8 - 7.45 - 1.14 - 0.14	E-glucoveracintine.mol		546.38	1	10.4859	0	0	Infinity
5	5_A-7-deacetylprotoveratrine B	10.92_750.4064m/z	10.92	750.406	750.406	732.397	690.386	672.374	154.123		10.92_750.4064m/z	A-7-deacetylprotoveratrine B	*	M+H-H2O	C39H61NO14	53.5	72.1	0.61631	96.1543	100 - 43.8 - 12.2 - 2.56 - 0.439	A-7-deacetylprotoveratrine B.mol		750.406	1	10.9198	0	0	463.406
6	A-xinganveratrine A	11.22_836.4221m/z	11.22	836.422	836.423	818.408	216.237	216.356	216.957		11.22_836.4221m/z	A-xinganveratrine A	*	M+H-2H2O	C46H65NO15	50.9	61.4	0.646444	94.1252	100 - 51.4 - 16 - 3.72 - 0.7 - 0.113	A-xinganveratrine A.mol		836.422	1	11.2181	2.62606e-08	1.67309e-10	Infinity
8	E-veralodisine	11.47_469.3196n	11.47	492.309	432.288	492.303	410.305	98.0966	99.9039		11.47_469.3196n	E-veralodisine	*	M+H, M+Na	C29H43NO4	50.1	54.1	0.834065	97.3156	100 - 32.4 - 5.89 - 0.778	E-veralodisine.mol	469.32	470.327	1	11.4667	5.19218e-12	5.68751e-14	Infinity
9	9_A-3,7-diacetyl-15-angeloylgermine	11.69_698.3514m/z	11.69	698.351	698.354	638.329	578.311	616.347	598.34		11.69_698.3514m/z	A-3,7-diacetyl-15-angeloylgermine	*	M+Na	C36H53NO11	52.2	63.3	0.414558	98.3712	100 - 40.3 - 10.2 - 1.92 - 0.296	A-3,7-diacetyl-15-angeloylgermine.mol		698.351	1	11.6865	3.71399e-06	1.71495e-08	3.20001
10	E-baikeidine	12.29_456.3474m/z	12.29	456.347	456.347	396.326	271.205	253.195	456.278		12.29_456.3474m/z	E-baikeidine	*	M+H-H2O	C29H47NO4	51	61.3	0.396747	94.229	100 - 32.4 - 5.91 - 0.78	E-baikeidine.mol		456.347	1	12.2925	6.09221e-06	2.72699e-08	Infinity
11	E-stenophylline B-3-O-β-D-glucopyranoside	12.43_600.3892m/z	12.43	600.389	380.331	398.342	560.394	542.384	98.0966		12.43_600.3892m/z	E-stenophylline B-3-O-β-D-glucopyranoside	*	M+Na	C33H55NO7	51.7	72.5	3.62825	90.4092	100 - 37 - 8.07 - 1.3 - 0.169	E-stenophylline B-3-O-β-D-glucopyranoside.mol		600.389	1	12.4256	0.00300344	9.49419e-06	189.474
12	A-2-methylbutyrylzygadenine	12.50_577.3625n	12.5	560.359	544.364	315.087	100.076	216.27	216.423		12.50_577.3625n	A-2-methylbutyrylzygadenine	*	M+H-H2O, M+H	C32H51NO8	52.8	67.8	1.86376	98.1939	100 - 35.9 - 7.89 - 1.29 - 0.172	A-2-methylbutyrylzygadenine.mol	577.363	578.371	1	12.5018	0.0186131	5.33209e-05	15749.9
14	14_E-baikeidine	12.61_474.3581m/z	12.61	474.358	474.358	98.0966	414.337	396.327	474.285		12.61_474.3581m/z	E-baikeidine	*	M+H	C29H47NO4	53.6	72.2	0.615331	96.5712	100 - 32.4 - 5.91 - 0.78	E-baikeidine.mol		474.358	1	12.6063	0	0	Infinity
15	C-23-methoxylcyclopamine-3-O-β-D-glucopyranoside	12.61_586.3741m/z	12.61	586.374	586.376	554.348	497.291	128.107	555.352		12.61_586.3741m/z	C-23-methoxylcyclopamine-3-O-β-D-glucopyranoside	*	M+H-H2O	C34H53NO8	51	67.3	0.40502	88.025	100 - 38.1 - 8.68 - 1.47 - 0.201	C-23-methoxylcyclopamine-3-O-β-D-glucopyranoside.mol		586.374	1	12.6063	7.88023e-09	5.44909e-11	13.2009
16	16_E-stenophylline B-3-O-β-D-glucopyranoside	12.62_578.4041m/z	12.62	578.404	578.405	98.0965	560.393	126.128	253.195		12.62_578.4041m/z	E-stenophylline B-3-O-β-D-glucopyranoside	*	M+H	C33H55NO7	53	73.5	-1.77936	93.4511	100 - 37 - 8.07 - 1.3 - 0.169	E-stenophylline B-3-O-β-D-glucopyranoside.mol		578.404	1	12.6194	0	0	15.064
17	A-7-deacetylprotoveratrine B	12.66_750.4058m/z	12.66	750.406	750.406	732.399	154.122	630.328	216.183		12.66_750.4058m/z	A-7-deacetylprotoveratrine B	*	M+H-H2O	C39H61NO14	50.7	69	-0.179743	84.6759	100 - 43.8 - 12.2 - 2.56 - 0.439	A-7-deacetylprotoveratrine B.mol		750.406	1	12.6567	1.17872e-11	1.2276e-13	2560.55
18	C-N-(methoxycarbonyl)-pseudojervine	12.73_628.3489m/z	12.73	628.349	628.347	610.337	592.328	458.291	217.075		12.73_628.3489m/z	C-N-(methoxycarbonyl)-pseudojervine	*	M+H-H2O	C35H51NO10	51.9	68.7	1.35295	92.1358	100 - 39.2 - 9.53 - 1.73 - 0.256	C-N-(methoxycarbonyl)-pseudojervine.mol		628.349	1	12.7324	5.5334e-06	2.49243e-08	Infinity
19	E-baikeidine	12.76_473.3510n	12.76	474.358	474.358	456.347	98.0962	396.326	414.337		12.76_473.3510n	E-baikeidine	*	M+H, M+Na	C29H47NO4	50.8	60.9	1.11837	94.2739	100 - 32.4 - 5.91 - 0.78	E-baikeidine.mol	473.351	474.358	1	12.7583	3.58602e-14	5.36365e-16	394188
21	A-7-deacetylprotoveratrine B	13.19_750.4055m/z	13.19	750.405	750.406	732.395	690.376	672.376	154.122		13.19_750.4055m/z	A-7-deacetylprotoveratrine B	*	M+H-H2O	C39H61NO14	50.8	71.8	-0.555826	82.7884	100 - 43.8 - 12.2 - 2.56 - 0.439	A-7-deacetylprotoveratrine B.mol		750.405	1	13.1928	5.6047e-06	2.52167e-08	26.5931
22	A-protoveratrine C	13.33_810.4280m/z	13.33	810.428	810.427	792.417	774.403	732.395	154.123		13.33_810.4280m/z	A-protoveratrine C	*	M+H	C41H63NO15	50.9	64.1	1.18017	91.7114	100 - 46 - 13.4 - 2.93 - 0.525	A-protoveratrine C.mol		810.428	1	13.3334	8.62697e-06	3.78842e-08	101.605
24	E-stenophylline B-3-O-β-D-glucopyranoside	13.46_577.3984n	13.46	600.388	600.389	600.381	560.396	378.315	600.353		13.46_577.3984n	E-stenophylline B-3-O-β-D-glucopyranoside	*	M+H, M+Na	C33H55NO7	56.9	86.6	1.01601	99.1677	100 - 37 - 8.07 - 1.3 - 0.169	E-stenophylline B-3-O-β-D-glucopyranoside.mol	577.398	578.406	1	13.4616	0	0	1075.96
25	A-7-deacetylprotoveratrine B	13.84_732.3961m/z	13.84	732.396	732.396	714.387	672.374	654.364	636.354		13.84_732.3961m/z	A-7-deacetylprotoveratrine B	*	M+H-2H2O	C39H61NO14	52.8	77.2	0.94035	87.8836	100 - 43.8 - 12.2 - 2.56 - 0.439	A-7-deacetylprotoveratrine B.mol		732.396	1	13.8427	1.25455e-14	2.00237e-16	325.593
26	B-veratravine D	13.90_386.2482m/z	13.9	386.248	386.248	371.226	220.33	66.569	87.0715		13.90_386.2482m/z	B-veratravine D	*	M+H-2H2O	C27H35NO3	52.2	69.2	0.950788	92.7529	100 - 30.1 - 4.98 - 0.592	B-veratravine D.mol		386.248	1	13.8967	0.00128869	4.25662e-06	Infinity
29	29_A-3-acetyl-15-angeloylgermine	14.18_633.3513n	14.18	634.359	634.361	616.348	556.327	516.297	474.286		14.18_633.3513n	A-3-acetyl-15-angeloylgermine	*	M+H-H2O, M+Na, M+H	C34H51NO10	50.2	53.2	-0.0536554	97.7395	100 - 38.1 - 9.12 - 1.63 - 0.238	A-3-acetyl-15-angeloylgermine.mol	633.351	634.359	1	14.1814	9.5131e-05	3.63e-07	5.36692
30	A-2-methylbutyrylzygadenine	14.27_542.3481m/z	14.27	542.348	542.35	524.337	525.343	216.355	216.334		14.27_542.3481m/z	A-2-methylbutyrylzygadenine	*	M+H-2H2O	C32H51NO8	53.8	84.9	0.80171	84.8681	100 - 35.9 - 7.89 - 1.29 - 0.172	A-2-methylbutyrylzygadenine.mol		542.348	1	14.2714	1.59273e-12	1.8831e-14	Infinity
31	E-veralodisine	14.39_470.3270m/z	14.39	470.327	470.327	410.306	114.091	124.112	112.076		14.39_470.3270m/z	E-veralodisine	*	M+H	C29H43NO4	51.1	64.5	1.09983	92.2587	100 - 32.4 - 5.89 - 0.778	E-veralodisine.mol		470.327	1	14.386	0	0	Infinity
32	32_A-3-acetyl-15-angeloylgermine	14.59_634.3596m/z	14.59	634.36	634.362	616.349	538.315	556.325	574.339		14.59_634.3596m/z	A-3-acetyl-15-angeloylgermine	*	M+H	C34H51NO10	52.4	65.4	1.54261	98.2408	100 - 38.1 - 9.12 - 1.63 - 0.238	A-3-acetyl-15-angeloylgermine.mol		634.36	1	14.5904	6.50221e-08	3.91208e-10	8.04379
33	A-3-acetyl-15-angeloylgermine	14.78_616.3486m/z	14.78	616.349	616.348	598.338	538.317	126.127	556.328		14.78_616.3486m/z	A-3-acetyl-15-angeloylgermine	*	M+H-H2O	C34H51NO10	51.4	65.6	0.984768	92.3586	100 - 38.1 - 9.12 - 1.63 - 0.238	A-3-acetyl-15-angeloylgermine.mol		616.349	1	14.7775	5.23189e-06	2.36422e-08	3.37035
34	34_C-N-(methoxycarbonyl)-pseudojervine	14.84_628.3485m/z	14.84	628.348	628.348	568.328	285.185	345.207	457.259		14.84_628.3485m/z	C-N-(methoxycarbonyl)-pseudojervine	*	M+H-H2O	C35H51NO10	50.5	63.4	0.783826	90.101	100 - 39.2 - 9.53 - 1.73 - 0.256	C-N-(methoxycarbonyl)-pseudojervine.mol		628.349	1	14.8416	2.37799e-12	2.73209e-14	Infinity
35	E-veralodisine	14.93_470.3272m/z	14.93	470.327	470.327	410.305	178.123	353.249	98.0962		14.93_470.3272m/z	E-veralodisine	*	M+H	C29H43NO4	55.6	87.9	1.41979	91.7702	100 - 32.4 - 5.89 - 0.778	E-veralodisine.mol		470.327	1	14.9337	6.51657e-12	7.04397e-14	Infinity
36	E-baikeidine	14.99_474.3572m/z	14.99	474.357	474.358	98.0966	414.337	216.819	322.06		14.99_474.3572m/z	E-baikeidine	*	M+H	C29H47NO4	51.5	73	-1.24642	85.9891	100 - 32.4 - 5.91 - 0.78	E-baikeidine.mol		474.357	1	14.9851	0	0	Infinity
37	C-23-methoxylcyclopamine-3-O-β-D-glucopyranoside	15.21_603.3778n	15.21	568.364	253.195	568.364	140.144	271.206	554.35		15.21_603.3778n	C-23-methoxylcyclopamine-3-O-β-D-glucopyranoside	*	M+H-2H2O, M+H, M+H-H2O	C34H53NO8	50.6	56.1	1.12902	98.233	100 - 38.1 - 8.68 - 1.47 - 0.201	C-23-methoxylcyclopamine-3-O-β-D-glucopyranoside.mol	603.378	568.364	1	15.2061	0.00070136	2.40814e-06	16.4271
40	E-verdinine	15.38_450.3002m/z	15.38	450.3	450.301	432.289	216.165	450.23	435.28		15.38_450.3002m/z	E-verdinine	*	M+H-H2O	C29H41NO4	50.5	68.8	-0.100365	84.04	100 - 32.4 - 5.89 - 0.776	E-verdinine.mol		450.3	1	15.3844	4.50839e-12	4.98239e-14	Infinity
41	A-3,7-diacetyl-15-angeloylgermine	15.45_698.3515m/z	15.45	698.351	698.352	638.331	538.278	598.3	616.349		15.45_698.3515m/z	A-3,7-diacetyl-15-angeloylgermine	*	M+Na	C36H53NO11	54	75.5	0.595833	95.3739	100 - 40.3 - 10.2 - 1.92 - 0.296	A-3,7-diacetyl-15-angeloylgermine.mol		698.351	1	15.4463	0.226474	0.000562453	4.81724
42	A-3-acetyl-15-angeloylgermine	15.52_616.3478m/z	15.52	616.348	616.345	598.34	616.384	394.309	538.319		15.52_616.3478m/z	A-3-acetyl-15-angeloylgermine	*	M+H-H2O	C34H51NO10	51	67.7	-0.304752	87.9509	100 - 38.1 - 9.12 - 1.63 - 0.238	A-3-acetyl-15-angeloylgermine.mol		616.348	1	15.5231	0.00155117	5.07438e-06	4.07917
43	A-zygadenilic acid δ-lactone	15.57_456.2746m/z	15.57	456.275	456.274	438.265	63.4294	455.641	216.824		15.57_456.2746m/z	A-zygadenilic acid δ-lactone	*	M+H-2H2O	C27H41NO7	51	70.8	0.215249	84.4928	100 - 30.3 - 5.87 - 0.852 - 0.101	A-zygadenilic acid δ-lactone.mol		456.275	1	15.572	1.14265e-05	4.92782e-08	Infinity
44	E-(20R,25R)-12β-O-acetyl-20β-hydroxyisoverazine-3-O-β-D-glucopyranoside	16.27_656.3793m/z	16.27	656.379	656.378	638.369	549.168	51.9496	420.13		16.27_656.3793m/z	E-(20R,25R)-12β-O-acetyl-20β-hydroxyisoverazine-3-O-β-D-glucopyranoside	*	M+Na	C35H55NO9	51.7	78.3	3.71037	84.6142	100 - 39.2 - 9.33 - 1.65 - 0.237	E-(20R,25R)-12β-O-acetyl-20β-hydroxyisoverazine-3-O-β-D-glucopyranoside.mol		656.379	1	16.2742	0.000421593	1.48942e-06	Infinity
45	A-protoveratrine C	16.36_792.4168m/z	16.36	792.417	792.418	774.404	756.396	165.055	714.381		16.36_792.4168m/z	A-protoveratrine C	*	M+H-H2O	C41H63NO15	50.5	67.9	0.386425	85.2235	100 - 46 - 13.4 - 2.93 - 0.525	A-protoveratrine C.mol		792.417	1	16.3617	4.15223e-14	6.15648e-16	Infinity
46	46_A-3-acetyl-15-angeloylgermine	16.73_598.3379m/z	16.73	598.338	598.337	580.327	562.318	458.295	458.286		16.73_598.3379m/z	A-3-acetyl-15-angeloylgermine	*	M+H-2H2O	C34H51NO10	52.5	74.3	0.749647	89.245	100 - 38.1 - 9.12 - 1.63 - 0.238	A-3-acetyl-15-angeloylgermine.mol		598.338	1	16.7321	0.350292	0.000850388	20.6671
47	B-veratravine D	16.85_404.2587m/z	16.85	404.259	404.258	386.247	291.173	289.159	381.707		16.85_404.2587m/z	B-veratravine D	*	M+H-H2O	C27H35NO3	50.1	60	0.594976	91.1912	100 - 30.1 - 4.98 - 0.592	B-veratravine D.mol		404.259	1	16.8486	0	0	88.0833
48	A-germitetrine	16.94_758.4108m/z	16.94	758.411	758.41	740.402	722.39	620.318	638.334		16.94_758.4108m/z	A-germitetrine	*	M+H-2H2O	C41H63NO14	50.7	66.3	-0.205488	87.6217	100 - 46 - 13.2 - 2.83 - 0.497	A-germitetrine.mol		758.411	1	16.9391	1.9786e-09	1.49963e-11	705.135
49	49_E-baikeidine	17.49_473.3510n	17.49	474.358	474.358	414.339	98.0962	396.326	456.349		17.49_473.3510n	E-baikeidine	*	M+H, M+Na	C29H47NO4	51.5	61	1.0435	97.6483	100 - 32.4 - 5.91 - 0.78	E-baikeidine.mol	473.351	474.358	1	17.4859	0	0	516636
51	E-baikeidine	17.78_474.3582m/z	17.78	474.358	474.358	98.0962	414.337	396.327	456.346		17.78_474.3582m/z	E-baikeidine	*	M+H	C29H47NO4	53.6	71.6	0.848716	97.5439	100 - 32.4 - 5.91 - 0.78	E-baikeidine.mol		474.358	1	17.781	0	0	387062
52	52_A-3-veratroyl-15-angeloylgermine	17.92_755.3888n	17.92	756.396	756.395	738.386	456.275	556.328	474.286		17.92_755.3888n	A-3-veratroyl-15-angeloylgermine	*	M+H, M+Na, M+H-H2O, M+H-2H2O	C41H57NO12	50.7	56.4	0.966467	98.3906	100 - 45.8 - 12.7 - 2.62 - 0.44	A-3-veratroyl-15-angeloylgermine.mol	755.389	756.396	1	17.9226	0	0	70.5522
56	A-12β-hydroxylveratroylzygadenine	18.10_684.3750m/z	18.1	684.375	684.378	666.362	606.338	648.348	587.284		18.10_684.3750m/z	A-12β-hydroxylveratroylzygadenine	*	M+H-H2O	C38H55NO11	50.4	59.2	1.10394	94.0545	100 - 42.5 - 11.1 - 2.15 - 0.339	A-12β-hydroxylveratroylzygadenine.mol		684.375	1	18.1049	1.48144e-10	1.32314e-12	7.24261
57	E-muldamine	18.30_458.3633m/z	18.3	458.363	458.363	98.0965	398.342	126.128	302.959		18.30_458.3633m/z	E-muldamine	*	M+H	C29H47NO3	55.9	82.7	0.956907	98.0125	100 - 32.4 - 5.69 - 0.712	E-muldamine.mol		458.363	1	18.2991	2.06838e-08	1.33849e-10	Infinity
58	A-12β-hydroxylveratroylzygadenine	18.34_702.3869m/z	18.34	702.387	702.389	684.378	642.363	624.355	606.341		18.34_702.3869m/z	A-12β-hydroxylveratroylzygadenine	*	M+H	C38H55NO11	50.8	76.5	2.96055	80.8338	100 - 42.5 - 11.1 - 2.15 - 0.339	A-12β-hydroxylveratroylzygadenine.mol		702.387	1	18.3385	0.0027747	8.80911e-06	Infinity
59	C-23-methoxylcyclopamine-3-O-β-D-glucopyranoside	18.68_626.3691m/z	18.68	626.369	626.37	608.356	626.386	608.366	446.308		18.68_626.3691m/z	C-23-methoxylcyclopamine-3-O-β-D-glucopyranoside	*	M+Na	C34H53NO8	50.2	63.9	4.54356	92.3461	100 - 38.1 - 8.68 - 1.47 - 0.201	C-23-methoxylcyclopamine-3-O-β-D-glucopyranoside.mol		626.369	1	18.6754	3.03868e-13	4.01017e-15	13.6104
60	60_A-3-veratroyl-15-angeloylgermine	18.69_778.3778m/z	18.69	778.378	778.379	678.325	496.268	596.321	656.343		18.69_778.3778m/z	A-3-veratroyl-15-angeloylgermine	*	M+Na	C41H57NO12	52.5	74	0.609861	89.3919	100 - 45.8 - 12.7 - 2.62 - 0.44	A-3-veratroyl-15-angeloylgermine.mol		778.378	1	18.6885	0	0	1771.72
61	E-baikeidine	18.77_474.3586m/z	18.77	474.359	474.358	98.0964	456.349	154.162	275.079		18.77_474.3586m/z	E-baikeidine	*	M+H	C29H47NO4	52.5	71.5	1.74465	93.213	100 - 32.4 - 5.91 - 0.78	E-baikeidine.mol		474.359	1	18.7748	1.11022e-16	2.43651e-18	Infinity
62	E-veralodisine	18.94_470.3269m/z	18.94	470.327	470.327	410.306	178.123	353.248	98.0961		18.94_470.3269m/z	E-veralodisine	*	M+H	C29H43NO4	52.8	72.8	0.88628	92.2786	100 - 32.4 - 5.89 - 0.778	E-veralodisine.mol		470.327	1	18.942	0	0	Infinity
63	63_A-verabenzoamine	19.05_757.4043n	19.05	758.412	758.412	740.402	620.322	638.333	656.344		19.05_757.4043n	A-verabenzoamine	*	M+H, M+Na	C41H59NO12	53.6	70.8	0.709696	98.2525	100 - 45.8 - 12.7 - 2.63 - 0.441	A-verabenzoamine.mol	757.404	758.412	1	19.0479	1.12173e-08	7.5739e-11	7.84059
65	65_A-protoveratrine C	19.36_832.4122m/z	19.36	832.412	832.409	814.401	632.339	398.343	650.356		19.36_832.4122m/z	A-protoveratrine C	*	M+Na	C41H63NO15	50.7	64.1	3.91781	93.9614	100 - 46 - 13.4 - 2.93 - 0.525	A-protoveratrine C.mol		832.412	1	19.3636	4.3029e-08	2.66178e-10	1608.54
66	B-veratrosine	2.02_571.3498n	2.02	554.346	554.348	457.259	84.0809	537.321	98.0968		2.02_571.3498n	B-veratrosine	*	M+H-H2O, M+H	C33H49NO7	52.8	70.2	-1.95597	96.0896	100 - 36.9 - 8.05 - 1.3 - 0.168	B-veratrosine.mol	571.35	572.359	1	2.01927	3.44491e-12	3.87022e-14	1.68335e+06
68	68_A-germine	2.03_510.3067m/z	2.03	510.307	510.307	151.076	492.296	474.287	217.421		2.03_510.3067m/z	A-germine	*	M+H	C27H43NO8	52.7	68.2	1.02586	96.2989	100 - 30.4 - 6.1 - 0.918 - 0.113	A-germine.mol		510.307	1	2.03257	0.00633662	1.92813e-05	9.4623
69	A-germine	2.21_510.3066m/z	2.21	510.307	510.307	492.294	474.287	92.9378	386.575		2.21_510.3066m/z	A-germine	*	M+H	C27H43NO8	56.2	86.6	0.905435	95.576	100 - 30.4 - 6.1 - 0.918 - 0.113	A-germine.mol		510.307	1	2.20583	0.000271727	9.81644e-07	10.0693
70	A-neoverataline A	2.30_472.2696m/z	2.3	472.27	472.269	454.258	114.091	472.069	436.251		2.30_472.2696m/z	A-neoverataline A	*	M+H-2H2O	C27H41NO8	51	64.8	0.414916	90.9945	100 - 30.3 - 6.09 - 0.917 - 0.113	A-neoverataline A.mol		472.27	1	2.29918	0.00617707	1.88185e-05	10.8658
71	71_A-veramadine B	2.55_478.3167m/z	2.55	478.317	462.321	478.317	460.306	114.091	442.301		2.55_478.3167m/z	A-veramadine B	*	M+H	C27H43NO6	52.3	64.2	0.71999	97.9665	100 - 30.3 - 5.66 - 0.789	A-veramadine B.mol		478.317	1	2.5466	0.000173407	6.41076e-07	31.1096
72	A-neoverataline A	2.59_472.2698m/z	2.59	472.27	472.27	454.259	114.091	436.249	472.177		2.59_472.2698m/z	A-neoverataline A	*	M+H-2H2O	C27H41NO8	52.1	71.6	0.898608	89.9076	100 - 30.3 - 6.09 - 0.917 - 0.113	A-neoverataline A.mol		472.27	1	2.58532	0.191316	0.000490322	4.43244
73	73_A-cevine	2.69_524.3225m/z	2.69	524.322	474.285	524.325	492.296	456.274	506.337		2.69_524.3225m/z	A-cevine	*	M+H	C28H45NO8	53.2	78.3	1.26883	89.406	100 - 31.5 - 6.43 - 0.986 - 0.124	A-cevine.mol		524.322	1	2.69167	1.7387e-07	9.7586e-10	23.8786
74	E-(20R,25R)-12β-O-acetyl-20β-hydroxyisoverazine-3-O-β-D-glucopyranoside	2.77_634.3954m/z	2.77	634.395	634.395	574.375	126.128	617.38	616.385		2.77_634.3954m/z	E-(20R,25R)-12β-O-acetyl-20β-hydroxyisoverazine-3-O-β-D-glucopyranoside	*	M+H	C35H55NO9	50.5	57.2	0.660108	96.0089	100 - 39.2 - 9.33 - 1.65 - 0.237	E-(20R,25R)-12β-O-acetyl-20β-hydroxyisoverazine-3-O-β-D-glucopyranoside.mol		634.395	1	2.77077	0.00158203	5.17031e-06	Infinity
75	E-muldamine	20.11_458.3632m/z	20.11	458.363	458.363	98.0966	398.342	126.128	271.207		20.11_458.3632m/z	E-muldamine	*	M+H	C29H47NO3	57.1	88	0.614715	98.382	100 - 32.4 - 5.69 - 0.712	E-muldamine.mol		458.363	1	20.1142	0	0	Infinity
76	C-23-methoxylcyclopamine-3-O-β-D-glucopyranoside	20.25_604.3861m/z	20.25	604.386	604.387	586.374	152.107	568.362	178.123		20.25_604.3861m/z	C-23-methoxylcyclopamine-3-O-β-D-glucopyranoside	*	M+H	C34H53NO8	53.3	88.2	2.84681	81.6171	100 - 38.1 - 8.68 - 1.47 - 0.201	C-23-methoxylcyclopamine-3-O-β-D-glucopyranoside.mol		604.386	1	20.2547	1.94289e-14	3.01995e-16	Infinity
77	A-3-veratroyl-15-angeloylgermine	20.36_720.3752m/z	20.36	720.375	720.375	702.364	538.317	154.123	165.055		20.36_720.3752m/z	A-3-veratroyl-15-angeloylgermine	*	M+H-2H2O	C41H57NO12	52.4	72.3	1.28006	91.1005	100 - 45.8 - 12.7 - 2.62 - 0.44	A-3-veratroyl-15-angeloylgermine.mol		720.375	1	20.356	3.55136e-07	1.90162e-09	25.0045
78	A-(+)-verussurine	21.12_799.4150n	21.12	800.422	800.423	782.412	740.402	722.392	154.123		21.12_799.4150n	A-(+)-verussurine	*	M+H, M+Na, M+H-H2O	C43H61NO13	53.9	71.2	0.852752	99.2373	100 - 48.1 - 14 - 3.01 - 0.529	A-(+)-verussurine.mol	799.415	800.422	1	21.1188	1.59991e-06	7.79417e-09	4.10685
81	D-β1-chaconine	21.17_670.4315m/z	21.17	670.432	670.43	555.333	84.0806	217.349	626.407		21.17_670.4315m/z	D-β1-chaconine	*	M+H-2H2O	C39H63NO10	50.7	60.1	0.170462	93.5247	100 - 43.7 - 11.4 - 2.18 - 0.34	D-β1-chaconine.mol		670.431	1	21.1692	0.000120859	4.55438e-07	Infinity
82	A-7-deacetylprotoveratrine B	21.47_732.3954m/z	21.47	732.395	732.397	714.38	614.334	596.32	696.372		21.47_732.3954m/z	A-7-deacetylprotoveratrine B	*	M+H-2H2O	C39H61NO14	51	67	0.0612303	88.1154	100 - 43.8 - 12.2 - 2.56 - 0.439	A-7-deacetylprotoveratrine B.mol		732.395	1	21.4704	0	0	73.619
83	83_E-muldamine	21.83_458.3633m/z	21.83	458.363	458.363	98.0966	398.344	126.128	271.205		21.83_458.3633m/z	E-muldamine	*	M+H	C29H47NO3	52.9	67.1	0.913612	98.4403	100 - 32.4 - 5.69 - 0.712	E-muldamine.mol		458.363	1	21.8345	8.37108e-14	1.19345e-15	950470
84	A-3-acetyl-15-angeloylgermine	22.00_598.3386m/z	22	598.339	598.338	538.317	520.306	580.33	498.286		22.00_598.3386m/z	A-3-acetyl-15-angeloylgermine	*	M+H-2H2O	C34H51NO10	52.5	83.7	1.75448	81.0263	100 - 38.1 - 9.12 - 1.63 - 0.238	A-3-acetyl-15-angeloylgermine.mol		598.339	1	21.9972	7.39834e-06	3.27512e-08	Infinity
87	87_A-germanitrine	22.01_717.4084n	22.01	718.417	718.417	700.406	658.396	640.385	622.375		22.01_717.4084n	A-germanitrine	*	M+H-2H2O, M+H-H2O, M+H	C39H59NO11	55.8	81.3	-0.610552	98.4488	100 - 43.6 - 11.6 - 2.27 - 0.363	A-germanitrine.mol	717.408	718.417	1	22.0098	0	0	41.8525
88	A-germanitrine	22.04_740.3975m/z	22.04	740.398	740.399	680.377	580.325	640.35	658.396		22.04_740.3975m/z	A-germanitrine	*	M+Na	C39H59NO11	52	64.1	-0.787232	96.7906	100 - 43.6 - 11.6 - 2.27 - 0.363	A-germanitrine.mol		740.397	1	22.0358	0	0	28.2123
89	A-germbudine	22.45_692.4023m/z	22.45	692.402	692.402	674.391	656.383	638.371	574.338		22.45_692.4023m/z	A-germbudine	*	M+H-H2O	C37H59NO12	51.4	70.9	2.56686	89.1661	100 - 41.5 - 10.9 - 2.13 - 0.341	A-germbudine.mol		692.402	1	22.4543	6.10623e-14	8.86391e-16	41.5699
90	B-veratrosine	22.59_572.3583m/z	22.59	572.358	572.358	84.0806	457.259	554.346	57.9703		22.59_572.3583m/z	B-veratrosine	*	M+H	C33H49NO7	53.1	97.7	0.274938	68.3058	100 - 36.9 - 8.05 - 1.3 - 0.168	B-veratrosine.mol		572.358	1	22.5949	0	0	Infinity
92	92_A-15-methylbutyryl-3-veratroylprotoveratine	22.60_773.3990n	22.6	774.407	774.405	756.393	738.381	154.123	696.375		22.60_773.3990n	A-15-methylbutyryl-3-veratroylprotoveratine	*	M+H-2H2O, M+H	C41H59NO13	50.7	56.2	0.400818	98.0689	100 - 45.9 - 13 - 2.73 - 0.468	A-15-methylbutyryl-3-veratroylprotoveratine.mol	773.399	774.407	1	22.6005	0	0	181.217
93	A-(+)-verussurine	22.67_782.4114m/z	22.67	782.411	782.41	764.397	680.37	662.329	216.249		22.67_782.4114m/z	A-(+)-verussurine	*	M+H-H2O	C43H61NO13	53.5	72.6	0.517362	95.6466	100 - 48.1 - 14 - 3.01 - 0.529	A-(+)-verussurine.mol		782.411	1	22.6651	7.12763e-14	1.02686e-15	30.3829
94	E-baikeidine	22.74_474.3584m/z	22.74	474.358	474.358	98.0966	216.81	140.107	414.336		22.74_474.3584m/z	E-baikeidine	*	M+H	C29H47NO4	50.4	55.7	1.30265	97.7826	100 - 32.4 - 5.91 - 0.78	E-baikeidine.mol		474.358	1	22.7371	1.3279e-10	1.1943e-12	Infinity
95	E-tetrahydroveralkamine	22.86_418.3685m/z	22.86	418.368	418.367	400.357	98.0966	418.239	373.108		22.86_418.3685m/z	E-tetrahydroveralkamine	*	M+H	C27H47NO2	50.6	58.5	1.25941	96.0676	100 - 30.2 - 4.81 - 0.536	E-tetrahydroveralkamine.mol		418.368	1	22.8592	6.99441e-15	1.15922e-16	1604.75
96	96_A-germitetrine	23.00_816.4164m/z	23	816.416	816.418	798.408	756.393	738.387	616.351		23.00_816.4164m/z	A-germitetrine	*	M+Na	C41H63NO14	52.3	69	2.89646	95.8244	100 - 46 - 13.2 - 2.83 - 0.497	A-germitetrine.mol		816.416	1	22.9965	2.89505e-11	2.84936e-13	51.4005
97	97_E-rhamnoveracintine	23.18_530.3844m/z	23.18	530.384	530.385	512.377	512.37	530.373	216.179		23.18_530.3844m/z	E-rhamnoveracintine	*	M+H	C32H51NO5	50.5	57.2	0.765357	96.4251	100 - 35.8 - 7.23 - 1.06 - 0.125	E-rhamnoveracintine.mol		530.384	1	23.1764	3.16398e-08	1.99204e-10	33.4603
98	E-muldamine	23.46_458.3631m/z	23.46	458.363	458.362	98.0966	398.341	126.128	271.207		23.46_458.3631m/z	E-muldamine	*	M+H	C29H47NO3	56.7	85.9	0.55388	98.3636	100 - 32.4 - 5.69 - 0.712	E-muldamine.mol		458.363	1	23.4577	1.66533e-14	2.61497e-16	107818
99	A-germitetrine	23.78_816.4170m/z	23.78	816.417	816.417	798.406	678.326	696.339	780.389		23.78_816.4170m/z	A-germitetrine	*	M+Na	C41H63NO14	51.6	72.4	3.70168	90.0181	100 - 46 - 13.2 - 2.83 - 0.497	A-germitetrine.mol		816.417	1	23.7808	0	0	292.02
100	A-germanaline	24.10_698.3869m/z	24.1	698.387	698.387	680.38	154.123	638.371	596.325		24.10_698.3869m/z	A-germanaline	*	M+H-H2O	C39H57NO11	50.6	73.8	-4.17829	84.1026	100 - 43.6 - 11.5 - 2.27 - 0.363	A-germanaline.mol		698.387	1	24.0969	0.232533	0.000576591	306.67
101	A-germanaline	24.21_698.3908m/z	24.21	698.391	698.387	680.38	154.123	638.37	578.318		24.21_698.3908m/z	A-germanaline	*	M+H-H2O	C39H57NO11	50.5	63.4	1.32144	90.7901	100 - 43.6 - 11.5 - 2.27 - 0.363	A-germanaline.mol		698.391	1	24.2087	6.08634e-10	4.97494e-12	Infinity
103	103_A-escholerine	24.26_775.4147n	24.26	776.422	776.422	758.412	740.402	698.39	658.359		24.26_775.4147n	A-escholerine	*	M+H-H2O, M+H	C41H61NO13	51.4	59.1	0.574972	98.7576	100 - 45.9 - 13 - 2.73 - 0.468	A-escholerine.mol	775.415	776.422	1	24.2611	0	0	4121.11
104	E-tetrahydroveralkamine	25.39_418.3682m/z	25.39	418.368	400.358	418.367	382.35	90.9764	418.241		25.39_418.3682m/z	E-tetrahydroveralkamine	*	M+H	C27H47NO2	50.4	59.5	0.510335	93.2724	100 - 30.2 - 4.81 - 0.536	E-tetrahydroveralkamine.mol		418.368	1	25.3877	0.000453845	1.59674e-06	125.674
105	E-tetrahydroveralkamine	25.56_418.3683m/z	25.56	418.368	418.369	400.357	128.143	418.236	90.977		25.56_418.3683m/z	E-tetrahydroveralkamine	*	M+H	C27H47NO2	52	64.8	0.785293	95.9086	100 - 30.2 - 4.81 - 0.536	E-tetrahydroveralkamine.mol		418.368	1	25.5599	7.09433e-14	1.02252e-15	6232.17
106	E-22-isoteinemine	25.93_430.3682m/z	25.93	430.368	430.37	412.358	90.9769	226.952	158.965		25.93_430.3682m/z	E-22-isoteinemine	*	M+H	C28H47NO2	53.3	71.3	0.456551	95.4931	100 - 31.3 - 5.13 - 0.588	E-22-isoteinemine.mol		430.368	1	25.9334	0	0	Infinity
107	A-15-methylbutyryl-3-veratroylprotoveratine	26.15_796.3905m/z	26.15	796.39	796.392	778.379	112.112	398.341	165.054		26.15_796.3905m/z	A-15-methylbutyryl-3-veratroylprotoveratine	*	M+Na	C41H59NO13	51.5	73.8	3.44504	87.566	100 - 45.9 - 13 - 2.73 - 0.468	A-15-methylbutyryl-3-veratroylprotoveratine.mol		796.391	1	26.1533	1.2167e-10	1.10057e-12	1648.62
108	108_A-protoveratrine B	26.69_788.4221m/z	26.69	788.422	788.421	770.413	752.4	772.426	154.121		26.69_788.4221m/z	A-protoveratrine B	*	M+H-2H2O	C42H65NO15	52.8	67.9	0.654209	96.758	100 - 47.1 - 13.9 - 3.08 - 0.557	A-protoveratrine B.mol		788.422	1	26.6869	2.58793e-12	2.95767e-14	1508.21
109	A-germanaline	26.91_738.3827m/z	26.91	738.383	738.38	678.362	578.307	638.34	720.374		26.91_738.3827m/z	A-germanaline	*	M+Na	C39H57NO11	52	65.5	0.507065	94.846	100 - 43.6 - 11.5 - 2.27 - 0.363	A-germanaline.mol		738.383	1	26.9099	1.05688e-07	6.1458e-10	60.6915
110	110_E-baikeidine	27.00_473.3507n	27	456.347	456.346	398.342	438.337	98.0967	219.945		27.00_473.3507n	E-baikeidine	*	M+H-H2O, M+H	C29H47NO4	50.3	58.5	0.318888	93.6117	100 - 32.4 - 5.91 - 0.78	E-baikeidine.mol	473.351	474.358	1	27.0016	6.54827e-06	2.91746e-08	113.388
112	A-15-methylbutyryl-3-veratroylprotoveratine	27.01_756.3959m/z	27.01	756.396	756.394	738.389	696.376	678.364	154.122		27.01_756.3959m/z	A-15-methylbutyryl-3-veratroylprotoveratine	*	M+H-H2O	C41H59NO13	50.7	57.6	0.704531	97.0044	100 - 45.9 - 13 - 2.73 - 0.468	A-15-methylbutyryl-3-veratroylprotoveratine.mol		756.396	1	27.0147	0.230079	0.000570844	Infinity
113	A-protoveratrine C	27.74_774.4072m/z	27.74	774.407	774.408	756.398	738.384	674.354	594.303		27.74_774.4072m/z	A-protoveratrine C	*	M+H-2H2O	C41H63NO15	50.3	65.4	1.55681	88.2383	100 - 46 - 13.4 - 2.93 - 0.525	A-protoveratrine C.mol		774.407	1	27.736	1.11022e-16	2.43651e-18	Infinity
114	E-baikeidine	28.00_474.3584m/z	28	474.358	474.359	456.347	438.337	263.876	474.287		28.00_474.3584m/z	E-baikeidine	*	M+H	C29H47NO4	52	66.8	1.37741	94.926	100 - 32.4 - 5.91 - 0.78	E-baikeidine.mol		474.358	1	27.9951	0	0	Infinity
115	B-veratrosine	28.06_572.3591m/z	28.06	572.359	572.359	457.259	84.0809	554.351	50.7476		28.06_572.3591m/z	B-veratrosine	*	M+H	C33H49NO7	52.1	69.5	1.59594	93.0993	100 - 36.9 - 8.05 - 1.3 - 0.168	B-veratrosine.mol		572.359	1	28.0623	7.37876e-05	2.85324e-07	Infinity
116	A-neoverataline A	3.09_472.2693m/z	3.09	472.269	472.27	454.258	114.091	359.186	436.25		3.09_472.2693m/z	A-neoverataline A	*	M+H-2H2O	C27H41NO8	50.3	61.6	-0.0814925	90.1854	100 - 30.3 - 6.09 - 0.917 - 0.113	A-neoverataline A.mol		472.269	1	3.08615	0.362415	0.000877993	2.71602
117	A-zygacine	3.51_518.3117m/z	3.51	518.312	518.311	500.301	458.291	477.304	482.289		3.51_518.3117m/z	A-zygacine	*	M+H-H2O	C29H45NO8	50.4	60.6	0.893148	92.2705	100 - 32.6 - 6.77 - 1.06 - 0.134	A-zygacine.mol		518.312	1	3.50552	0.00255945	8.15571e-06	6.7294
118	118_A-2-methylbutyrylzygadenine	3.54_578.3692m/z	3.54	578.369	578.37	560.359	542.349	82.0652	84.0805		3.54_578.3692m/z	A-2-methylbutyrylzygadenine	*	M+H	C32H51NO8	55.9	86	0.727555	94.3449	100 - 35.9 - 7.89 - 1.29 - 0.172	A-2-methylbutyrylzygadenine.mol		578.369	1	3.54467	4.96154e-06	2.24931e-08	48.4183
119	A-zygacine	3.69_536.3222m/z	3.69	536.322	536.322	518.312	500.301	299.062	458.285		3.69_536.3222m/z	A-zygacine	*	M+H	C29H45NO8	54.6	76.1	0.771055	97.9754	100 - 32.6 - 6.77 - 1.06 - 0.134	A-zygacine.mol		536.322	1	3.69087	0.00558461	1.71095e-05	6.86044
120	A-2-methylbutyrylzygadenine	3.69_560.3586m/z	3.69	560.359	560.36	542.347	111.104	362.285	110.097		3.69_560.3586m/z	A-2-methylbutyrylzygadenine	*	M+H-H2O	C32H51NO8	50.1	57.2	0.722325	94.102	100 - 35.9 - 7.89 - 1.29 - 0.172	A-2-methylbutyrylzygadenine.mol		560.359	1	3.69087	1.00735e-11	1.05997e-13	850.165
121	A-zygacine	3.85_500.3012m/z	3.85	500.301	500.301	482.291	216.192	147.044	216.779		3.85_500.3012m/z	A-zygacine	*	M+H-2H2O	C29H45NO8	54	79.1	0.921991	91.8681	100 - 32.6 - 6.77 - 1.06 - 0.134	A-zygacine.mol		500.301	1	3.84662	0.131601	0.000342898	2.76213
122	A-zygadenine	4.11_494.3115m/z	4.11	494.312	494.312	476.304	246.085	245.082	127.039		4.11_494.3115m/z	A-zygadenine	*	M+H	C27H43NO7	50.8	59.2	0.59795	95.6075	100 - 30.3 - 5.88 - 0.854 - 0.101	A-zygadenine.mol		494.312	1	4.11047	0.00106177	3.54631e-06	18.1919
123	A-zygacine	4.32_518.3118m/z	4.32	518.312	518.31	500.3	219.017	518.23	473.076		4.32_518.3118m/z	A-zygacine	*	M+H-H2O	C29H45NO8	50.2	60.5	1.08562	91.7774	100 - 32.6 - 6.77 - 1.06 - 0.134	A-zygacine.mol		518.312	1	4.32065	0.000762408	2.60696e-06	7.18781
124	A-neoverataline A	4.35_472.2700m/z	4.35	472.27	472.268	454.258	114.091	454.187	436.249		4.35_472.2700m/z	A-neoverataline A	*	M+H-2H2O	C27H41NO8	53.9	78.4	1.17482	92.553	100 - 30.3 - 6.09 - 0.917 - 0.113	A-neoverataline A.mol		472.27	1	4.34687	0.0519343	0.000142018	2.75642
125	C-pseudojervine	4.48_570.3430m/z	4.48	570.343	570.342	229.086	408.29	275.18	84.0811		4.48_570.3430m/z	C-pseudojervine	*	M+H-H2O	C33H49NO8	52.1	68.9	0.880378	92.4503	100 - 36.9 - 8.27 - 1.38 - 0.185	C-pseudojervine.mol		570.343	1	4.47803	7.40741e-13	9.18881e-15	364.478
126	126_A-3-vanilloylzygadenine	4.54_644.3431m/z	4.54	644.343	644.344	626.335	608.328	458.293	608.315		4.54_644.3431m/z	A-3-vanilloylzygadenine	*	M+H	C35H49NO10	50.4	59.5	0.317649	92.9202	100 - 39.2 - 9.52 - 1.73 - 0.255	A-3-vanilloylzygadenine.mol		644.343	1	4.54402	6.20589e-06	2.77374e-08	31.3486
127	A-2-methylbutyrylzygadenine	4.58_560.3585m/z	4.58	560.359	560.359	542.349	108.081	426.299	217.969		4.58_560.3585m/z	A-2-methylbutyrylzygadenine	*	M+H-H2O	C32H51NO8	52.9	75.9	0.493853	89.3068	100 - 35.9 - 7.89 - 1.29 - 0.172	A-2-methylbutyrylzygadenine.mol		560.358	1	4.58217	1.14929e-10	1.04319e-12	Infinity
128	A-3-acetyl-15-angeloylgermine	4.61_634.3593m/z	4.61	634.359	634.359	616.347	556.328	438.261	216.957		4.61_634.3593m/z	A-3-acetyl-15-angeloylgermine	*	M+H	C34H51NO10	50.8	66.5	1.08426	89.0358	100 - 38.1 - 9.12 - 1.63 - 0.238	A-3-acetyl-15-angeloylgermine.mol		634.359	1	4.60787	1.83076e-13	2.4842e-15	Infinity
129	A-zygacine	4.67_518.3117m/z	4.67	518.312	518.312	500.3	377.102	243.066	216.27		4.67_518.3117m/z	A-zygacine	*	M+H-H2O	C29H45NO8	50.1	60.8	0.903973	90.667	100 - 32.6 - 6.77 - 1.06 - 0.134	A-zygacine.mol		518.312	1	4.67178	0.00603193	1.84014e-05	6.83306
130	A-veramadine B	4.82_478.3168m/z	4.82	478.317	478.316	460.308	114.091	347.223	216.199		4.82_478.3168m/z	A-veramadine B	*	M+H	C27H43NO6	52.4	67	1.07416	96.3031	100 - 30.3 - 5.66 - 0.789	A-veramadine B.mol		478.317	1	4.81695	0.0079394	2.38884e-05	13.2152
131	A-zygacine	4.83_536.3223m/z	4.83	536.322	536.322	518.312	299.062	500.299	195.103		4.83_536.3223m/z	A-zygacine	*	M+H	C29H45NO8	55.2	81.9	0.921928	95.4345	100 - 32.6 - 6.77 - 1.06 - 0.134	A-zygacine.mol		536.322	1	4.83005	0.0120403	3.53039e-05	5.26034
132	B-veratravine A	4.92_586.3381m/z	4.92	586.338	586.337	568.327	471.239	84.0808	114.091		4.92_586.3381m/z	B-veratravine A	*	M+H	C33H47NO8	53.2	76.9	1.1526	90.6931	100 - 36.9 - 8.26 - 1.37 - 0.185	B-veratravine A.mol		586.338	1	4.92227	0	0	87.7201
133	C-pseudojervine	4.97_570.3430m/z	4.97	570.343	570.344	219.103	455.243	84.0809	552.333		4.97_570.3430m/z	C-pseudojervine	*	M+H-H2O	C33H49NO8	50.2	59.6	0.81066	92.5912	100 - 36.9 - 8.27 - 1.38 - 0.185	C-pseudojervine.mol		570.343	1	4.97473	3.49151e-05	1.40573e-07	37.3174
134	C-N-(methoxycarbonyl)-pseudojervine	5.04_628.3461m/z	5.04	628.346	515.261	628.344	515.352	216.204	216.185		5.04_628.3461m/z	C-N-(methoxycarbonyl)-pseudojervine	*	M+H-H2O	C35H51NO10	53.2	77.4	-2.9458	92.006	100 - 39.2 - 9.53 - 1.73 - 0.256	C-N-(methoxycarbonyl)-pseudojervine.mol		628.346	1	5.04122	1.11022e-16	2.43651e-18	32.0362
135	A-zygadenine	5.13_516.2956m/z	5.13	516.296	516.296	498.286	154.123	480.274	475.29		5.13_516.2956m/z	A-zygadenine	*	M+Na	C27H43NO7	51.7	74.5	4.99493	89.8362	100 - 30.3 - 5.88 - 0.854 - 0.101	A-zygadenine.mol		516.296	1	5.13265	5.83058e-05	2.28245e-07	229.429
136	136_E-baikeidine	5.16_474.3582m/z	5.16	474.358	474.36	98.0965	414.337	396.324	216.351		5.16_474.3582m/z	E-baikeidine	*	M+H	C29H47NO4	52	64.1	0.797322	97.0412	100 - 32.4 - 5.91 - 0.78	E-baikeidine.mol		474.358	1	5.15797	0.367266	0.000889035	Infinity
137	A-zygacine	5.21_536.3222m/z	5.21	536.322	536.322	518.311	299.061	500.304	216.314		5.21_536.3222m/z	A-zygacine	*	M+H	C29H45NO8	51.2	65.9	0.77193	90.7954	100 - 32.6 - 6.77 - 1.06 - 0.134	A-zygacine.mol		536.322	1	5.21055	2.22045e-16	4.72495e-18	68.143
138	A-3-acetyl-15-angeloylgermine	5.37_634.3592m/z	5.37	634.359	634.359	616.349	534.307	516.297	498.285		5.37_634.3592m/z	A-3-acetyl-15-angeloylgermine	*	M+H	C34H51NO10	51.6	70.1	1.03438	89.0472	100 - 38.1 - 9.12 - 1.63 - 0.238	A-3-acetyl-15-angeloylgermine.mol		634.359	1	5.36758	1.17055e-09	9.16966e-12	63.2868
139	C-verdine	5.47_442.2957m/z	5.47	442.296	442.296	114.091	424.285	409.297	425.295		5.47_442.2957m/z	C-verdine	*	M+H-H2O	C27H41NO5	50.1	57.6	1.06313	94.0545	100 - 30.2 - 5.44 - 0.724	C-verdine.mol		442.296	1	5.474	0	0	13.5681
140	E-(20R,25R)-12β-O-acetyl-20β-hydroxyisoverazine-3-O-β-D-glucopyranoside	5.66_634.3957m/z	5.66	634.396	634.395	574.374	98.0965	620.38	616.381		5.66_634.3957m/z	E-(20R,25R)-12β-O-acetyl-20β-hydroxyisoverazine-3-O-β-D-glucopyranoside	*	M+H	C35H55NO9	56.3	85.8	1.16693	97.3759	100 - 39.2 - 9.33 - 1.65 - 0.237	E-(20R,25R)-12β-O-acetyl-20β-hydroxyisoverazine-3-O-β-D-glucopyranoside.mol		634.396	1	5.66145	9.54792e-15	1.54624e-16	891266
141	C-N-(methoxycarbonyl)-pseudojervine	5.77_646.3587m/z	5.77	646.359	646.358	613.362	313.204	629.36	602.374		5.77_646.3587m/z	C-N-(methoxycarbonyl)-pseudojervine	*	M+H	C35H51NO10	50	57.3	0.163183	92.8946	100 - 39.2 - 9.53 - 1.73 - 0.256	C-N-(methoxycarbonyl)-pseudojervine.mol		646.359	1	5.7659	2.13027e-10	1.86226e-12	1660.44
142	B-veratravine A	5.79_586.3378m/z	5.79	586.338	586.338	568.331	471.238	425.122	216.483		5.79_586.3378m/z	B-veratravine A	*	M+H	C33H47NO8	50.3	61.8	0.622203	90.5222	100 - 36.9 - 8.26 - 1.37 - 0.185	B-veratravine A.mol		586.338	1	5.79248	8.43769e-14	1.20158e-15	54.081
143	A-veramadine B	5.82_478.3167m/z	5.82	478.317	478.316	460.305	98.0964	442.297	216.327		5.82_478.3167m/z	A-veramadine B	*	M+H	C27H43NO6	52	66.7	0.819861	94.3227	100 - 30.3 - 5.66 - 0.789	A-veramadine B.mol		478.317	1	5.81875	4.99003e-11	4.75462e-13	128.957
144	144_B-veratravine A	5.90_568.3268m/z	5.9	568.327	568.327	84.0807	453.224	114.091	273.165		5.90_568.3268m/z	B-veratravine A	*	M+H-H2O	C33H47NO8	50.6	62.5	-0.0622689	90.5944	100 - 36.9 - 8.26 - 1.37 - 0.185	B-veratravine A.mol		568.327	1	5.89743	5.04542e-08	3.09077e-10	244.696
145	A-3-acetyl-15-angeloylgermine	5.97_633.3514n	5.97	634.359	634.359	616.351	556.329	634.384	538.316		5.97_633.3514n	A-3-acetyl-15-angeloylgermine	*	M+H, M+Na	C34H51NO10	50.9	61.6	0.203065	93.3191	100 - 38.1 - 9.12 - 1.63 - 0.238	A-3-acetyl-15-angeloylgermine.mol	633.351	634.359	1	5.97197	2.59048e-12	2.96005e-14	10.11
147	C-N-(methoxycarbonyl)-pseudojervine	6.05_628.3460m/z	6.05	628.346	628.348	610.34	217.436	568.327	50.9697		6.05_628.3460m/z	C-N-(methoxycarbonyl)-pseudojervine	*	M+H-H2O	C35H51NO10	50.2	69	-3.10496	85.8434	100 - 39.2 - 9.53 - 1.73 - 0.256	C-N-(methoxycarbonyl)-pseudojervine.mol		628.346	1	6.05003	2.14273e-14	3.30692e-16	Infinity
148	A-veramadine B	6.42_478.3170m/z	6.42	478.317	478.316	460.306	218.809	411.252	142.799		6.42_478.3170m/z	A-veramadine B	*	M+H	C27H43NO6	53.6	76.7	1.5056	92.9933	100 - 30.3 - 5.66 - 0.789	A-veramadine B.mol		478.317	1	6.42242	0.565906	0.00131823	37.8517
149	149_A-3-veratroylprotoveratine	6.53_690.3487m/z	6.53	690.349	690.35	672.338	114.091	406.277	424.285		6.53_690.3487m/z	A-3-veratroylprotoveratine	*	M+H	C36H51NO12	51	66.8	0.433075	88.7639	100 - 40.3 - 10.4 - 2 - 0.317	A-3-veratroylprotoveratine.mol		690.349	1	6.5261	5.56961e-05	2.18626e-07	5.83871
150	A-7-deacetylprotoveratrine B	6.61_768.4167m/z	6.61	768.417	114.092	768.42	750.406	217.964	331.227		6.61_768.4167m/z	A-7-deacetylprotoveratrine B	*	M+H	C39H61NO14	50.5	67.5	0.346192	85.6208	100 - 43.8 - 12.2 - 2.56 - 0.439	A-7-deacetylprotoveratrine B.mol		768.417	1	6.60588	0.0156996	4.53893e-05	Infinity
151	C-veraussines B	7.10_560.3224m/z	7.1	560.322	560.32	542.309	220.045	416.247	491.05		7.10_560.3224m/z	C-veraussines B	*	M+H	C31H45NO8	50.6	61.2	1.01895	93.0632	100 - 34.7 - 7.49 - 1.21 - 0.158	C-veraussines B.mol		560.322	1	7.10277	0.334713	0.00081423	Infinity
152	C-pseudojervine	7.11_570.3435m/z	7.11	570.343	457.258	84.0808	554.348	114.091	142.123		7.11_570.3435m/z	C-pseudojervine	*	M+H-H2O	C33H49NO8	54	81.6	1.62997	90.2528	100 - 36.9 - 8.27 - 1.38 - 0.185	C-pseudojervine.mol		570.343	1	7.11473	0.000318328	1.14091e-06	19.0761
153	A-xinganveratrine A	7.13_836.4217m/z	7.13	836.422	836.42	818.414	754.381	72.9898	396.445		7.13_836.4217m/z	A-xinganveratrine A	*	M+H-2H2O	C46H65NO15	51.5	68.8	0.205337	89.0318	100 - 51.4 - 16 - 3.72 - 0.7 - 0.113	A-xinganveratrine A.mol		836.422	1	7.12768	4.57178e-09	3.28083e-11	Infinity
154	A-3-veratroylprotoveratine	7.18_690.3498m/z	7.18	690.35	690.351	672.337	369.27	626.597	173.177		7.18_690.3498m/z	A-3-veratroylprotoveratine	*	M+H	C36H51NO12	51.5	71.5	1.99908	88.5813	100 - 40.3 - 10.4 - 2 - 0.317	A-3-veratroylprotoveratine.mol		690.35	1	7.18008	1.096e-07	6.35104e-10	Infinity
156	156_B-veratrosine	7.28_571.3507n	7.28	572.359	572.361	457.257	84.0808	554.348	114.091		7.28_571.3507n	B-veratrosine	*	M+H-H2O, M+H	C33H49NO7	54.8	78.4	-0.346171	96.2411	100 - 36.9 - 8.05 - 1.3 - 0.168	B-veratrosine.mol	571.351	572.359	1	7.28317	0	0	357.283
157	A-veramadine B	7.41_478.3166m/z	7.41	478.317	478.316	460.304	442.296	478.163	98.0958		7.41_478.3166m/z	A-veramadine B	*	M+H	C27H43NO6	50.3	60	0.509375	91.9627	100 - 30.3 - 5.66 - 0.789	A-veramadine B.mol		478.317	1	7.4125	3.75986e-07	2.00695e-09	Infinity
159	159_A-3-acetyl-15-angeloylgermine	7.43_633.3515n	7.43	656.341	656.34	596.323	574.339	556.328	612.351		7.43_633.3515n	A-3-acetyl-15-angeloylgermine	*	M+H-2H2O, M+Na, M+H-H2O	C34H51NO10	51.7	66.7	0.263728	92.1354	100 - 38.1 - 9.12 - 1.63 - 0.238	A-3-acetyl-15-angeloylgermine.mol	633.351	656.341	1	7.42507	1.02587e-08	6.97069e-11	3.45067
161	B-veratravine D	7.49_404.2588m/z	7.49	404.259	404.259	389.236	289.159	216.202	84.0806		7.49_404.2588m/z	B-veratravine D	*	M+H-H2O	C27H35NO3	53	76.9	1.03258	89.1576	100 - 30.1 - 4.98 - 0.592	B-veratravine D.mol		404.259	1	7.4905	0.00174568	5.6786e-06	Infinity
162	A-zygacine	7.67_536.3221m/z	7.67	536.322	536.322	518.312	448.306	299.06	415.033		7.67_536.3221m/z	A-zygacine	*	M+H	C29H45NO8	52	73.1	0.501569	87.4383	100 - 32.6 - 6.77 - 1.06 - 0.134	A-zygacine.mol		536.322	1	7.67413	2.80203e-09	2.0741e-11	Infinity
163	C-pseudojervine	7.76_570.3434m/z	7.76	570.343	457.259	84.0807	554.348	570.342	114.092		7.76_570.3434m/z	C-pseudojervine	*	M+H-H2O	C33H49NO8	53.5	77.5	1.42159	91.6049	100 - 36.9 - 8.27 - 1.38 - 0.185	C-pseudojervine.mol		570.343	1	7.76322	2.32037e-14	3.55842e-16	9.96529
164	164_E-baikeidine	7.88_474.3579m/z	7.88	474.358	474.357	98.0967	414.336	396.329	456.347		7.88_474.3579m/z	E-baikeidine	*	M+H	C29H47NO4	52.5	66.3	0.30398	96.5261	100 - 32.4 - 5.91 - 0.78	E-baikeidine.mol		474.358	1	7.87762	1.16573e-14	1.8677e-16	Infinity
166	A-3-veratroylprotoveratine	8.00_654.3277m/z	8	654.328	636.318	654.327	618.303	165.055	612.352		8.00_654.3277m/z	A-3-veratroylprotoveratine	*	M+H-2H2O	C36H51NO12	51.8	68.8	0.58541	91.0249	100 - 40.3 - 10.4 - 2 - 0.317	A-3-veratroylprotoveratine.mol		654.328	1	8.00452	4.10808e-08	2.54679e-10	5.31155
167	A-3-acetyl-15-angeloylgermine	8.24_616.3485m/z	8.24	616.348	616.348	598.338	154.123	538.316	438.264		8.24_616.3485m/z	A-3-acetyl-15-angeloylgermine	*	M+H-H2O	C34H51NO10	52.1	73.4	0.744501	87.7869	100 - 38.1 - 9.12 - 1.63 - 0.238	A-3-acetyl-15-angeloylgermine.mol		616.348	1	8.2392	3.82198e-07	2.03787e-09	40.0458
168	C-pseudojervine	8.76_570.3437m/z	8.76	570.344	570.342	408.289	455.242	84.0807	552.321		8.76_570.3437m/z	C-pseudojervine	*	M+H-H2O	C33H49NO8	51.7	72.9	2.05733	88.1673	100 - 36.9 - 8.27 - 1.38 - 0.185	C-pseudojervine.mol		570.344	1	8.76365	0.00612524	1.86714e-05	14.6222
169	169_A-3-veratroylprotoveratine	9.17_654.3280m/z	9.17	654.328	636.316	654.329	618.308	610.337	637.321		9.17_654.3280m/z	A-3-veratroylprotoveratine	*	M+H-2H2O	C36H51NO12	53.8	79.8	1.05509	90.3355	100 - 40.3 - 10.4 - 2 - 0.317	A-3-veratroylprotoveratine.mol		654.328	1	9.17072	0.0176083	5.06313e-05	4.46373
170	B-20isoveratramine	9.36_424.2853m/z	9.36	424.285	424.283	406.274	424.288	309.185	84.0807		9.36_424.2853m/z	B-20isoveratramine	*	M+H	C27H37NO3	50.1	59.1	1.59547	93.1476	100 - 30.1 - 4.99 - 0.594	B-20isoveratramine.mol		424.285	1	9.35973	2.19824e-14	3.38513e-16	18.7868
171	A-germanaline	9.53_698.3896m/z	9.53	698.39	698.39	84.0806	277.195	114.091	680.382		9.53_698.3896m/z	A-germanaline	*	M+H-H2O	C39H57NO11	51.1	66.5	-0.415652	89.3485	100 - 43.6 - 11.5 - 2.27 - 0.363	A-germanaline.mol		698.39	1	9.52797	0.0408369	0.000112976	Infinity
172	A-3-veratroylprotoveratine	9.65_654.3280m/z	9.65	654.328	636.317	654.328	618.304	654.354	618.314		9.65_654.3280m/z	A-3-veratroylprotoveratine	*	M+H-2H2O	C36H51NO12	51.9	71.2	1.12039	89.7982	100 - 40.3 - 10.4 - 2 - 0.317	A-3-veratroylprotoveratine.mol		654.328	1	9.6457	5.19785e-09	3.69062e-11	83.1537
173	A-7-deacetylprotoveratrine B	9.70_768.4168m/z	9.7	768.417	768.42	750.402	750.416	514.282	734.41		9.70_768.4168m/z	A-7-deacetylprotoveratrine B	*	M+H	C39H61NO14	50.9	61.3	0.465285	93.991	100 - 43.8 - 12.2 - 2.56 - 0.439	A-7-deacetylprotoveratrine B.mol		768.417	1	9.69642	6.21816e-08	3.75453e-10	794.946
